# Supplementary material for: Promotion Effect of Coexposure to a High-Fat Diet and Nano-Diethylnitrosamine on the Progression of Fatty Liver Malignant Transformation into Liver Cancer
Source: MDPI journal article supplement (doi:10.3390/ijms241814162), 2023-09-15
Supplement: s1 [file s1]

**Supplementary Material Table S1.**

| HFD vs control |                                                          | nanoDEN+HFD vs control |                                                          | nanoDEN vs control |                                                          |
|----------------|----------------------------------------------------------|------------------------|----------------------------------------------------------|--------------------|----------------------------------------------------------|
| Rank           | Description                                              | Rank                   | Description                                              | Rank               | Description                                              |
| 1              | Pathways of neurodegeneration - multiple diseases        | 1                      | Pathways of neurodegeneration - multiple diseases        | 1                  | <b>FoxO signaling pathway</b>                            |
| 2              | Alzheimer disease                                        | 2                      | <b>Chemical carcinogenesis - reactive oxygen species</b> | 2                  | PI3K-Akt signaling pathway                               |
| 3              | Amyotrophic lateral sclerosis                            | 3                      | <b>Non-alcoholic fatty liver disease</b>                 | 3                  | MicroRNAs in cancer                                      |
| 4              | <b>Chemical carcinogenesis - reactive oxygen species</b> | 4                      | PI3K-Akt signaling pathway                               | 4                  | Pathways of neurodegeneration - multiple diseases        |
| 5              | Thermogenesis                                            | 5                      | Human papillomavirus infection                           | 5                  | <b>AMPK signaling pathway</b>                            |
| 6              | PI3K-Akt signaling pathway                               | 6                      | Huntington disease                                       | 6                  | <b>p53 signaling pathway</b>                             |
| 7              | Human papillomavirus infection                           | 7                      | Thermogenesis                                            | 7                  | Human papillomavirus infection                           |
| 8              | <b>Non-alcoholic fatty liver disease</b>                 | 8                      | Alzheimer disease                                        | 8                  | Amyotrophic lateral sclerosis                            |
| 9              | Herpes simplex virus 1 infection                         | 9                      | Parkinson disease                                        | 9                  | MAPK signaling pathway                                   |
| 10             | Prion disease                                            | 10                     | Prion disease                                            | 10                 | Lipid and atherosclerosis                                |
| 11             | Huntington disease                                       | 11                     | Salmonella infection                                     | 11                 | <b>Chemical carcinogenesis - reactive oxygen species</b> |
| 12             | Diabetic cardiomyopathy                                  | 12                     | MAPK signaling pathway                                   | 12                 | Alcoholic liver disease                                  |
| 13             | Salmonella infection                                     | 13                     | Human immunodeficiency virus 1 infection                 | 13                 | Alzheimer disease                                        |
| 14             | MAPK signaling pathway                                   | 14                     | Endocytosis                                              | 14                 | Kaposi sarcoma-associated herpesvirus infection          |
| 15             | Endocytosis                                              | 15                     | Viral carcinogenesis                                     | 15                 | <b>Non-alcoholic fatty liver disease</b>                 |
| 16             | <b>p53 signaling pathway</b>                             | 16                     | Coronavirus disease - COVID-19                           | 16                 | Chemical carcinogenesis - receptor activation            |
| 17             | Parkinson disease                                        | 17                     | Amyotrophic lateral sclerosis                            | 17                 | Human cytomegalovirus infection                          |
| 18             | Chemical carcinogenesis - receptor activation            | 18                     | Human T-cell leukemia virus 1 infection                  | 18                 | Thyroid hormone signaling pathway                        |
| 19             | Coronavirus disease - COVID-19                           | 19                     | <b>p53 signaling pathway</b>                             | 19                 | Prion disease                                            |
| 20             | NOD-like receptor signaling pathway                      | 20                     | <b>AMPK signaling pathway</b>                            | 20                 | Hepatitis B                                              |
| 21             | Oxidative phosphorylation                                | 21                     | Diabetic cardiomyopathy                                  | 21                 | Hepatitis C                                              |
| 22             | Biosynthesis of cofactors                                | 22                     | Chemical carcinogenesis - receptor activation            | 22                 | Hepatocellular carcinoma                                 |
| 23             | Human immunodeficiency virus 1 infection                 | 23                     | Epstein-Barr virus infection                             | 23                 | Proteoglycans in cancer                                  |
| 24             | Proteoglycans in cancer                                  | 24                     | Human cytomegalovirus infection                          | 24                 | Regulation of actin cytoskeleton                         |
| 25             | Epstein-Barr virus infection                             | 25                     | Tight junction                                           | 25                 | Epstein-Barr virus infection                             |
| 26             | Viral carcinogenesis                                     | 26                     | Protein processing in endoplasmic reticulum              | 26                 | Parkinson disease                                        |
| 27             | Human T-cell leukemia virus 1 infection                  | 27                     | Alcoholic liver disease                                  | 27                 | Huntington disease                                       |
| 28             | Focal adhesion                                           | 28                     | Biosynthesis of cofactors                                | 28                 | Apoptosis                                                |
| 29             | Rap1 signaling pathway                                   | 29                     | Hepatocellular carcinoma                                 | 29                 | Apelin signaling pathway                                 |
| 30             | Protein processing in endoplasmic reticulum              | 30                     | Proteoglycans in cancer                                  | 30                 | Measles                                                  |
| 31             | Regulation of actin cytoskeleton                         | 31                     | Lipid and atherosclerosis                                | 31                 | Prostate cancer                                          |
| 32             | Ubiquitin mediated proteolysis                           | 32                     | Regulation of actin cytoskeleton                         | 32                 | cGMP-PKG signaling pathway                               |
| 33             | Cellular senescence                                      | 33                     | Herpes simplex virus 1 infection                         | 33                 | Viral carcinogenesis                                     |
| 34             | Neutrophil extracellular trap formation                  | 34                     | Insulin signaling pathway                                | 34                 | Ras signaling pathway                                    |
| 35             | Tight junction                                           | 35                     | Phagosome                                                | 35                 | Endocytosis                                              |
| 36             | Autophagy - animal                                       | 36                     | Spliceosome                                              | 36                 | Platinum drug resistance                                 |
| 37             | mTOR signaling pathway                                   | 37                     | Tuberculosis                                             | 37                 | Glucagon signaling pathway                               |
| 38             | <b>FoxO signaling pathway</b>                            | 38                     | Lysosome                                                 | 38                 | Insulin resistance                                       |
| 39             | Hepatocellular carcinoma                                 | 39                     | Hepatitis C                                              | 39                 | Toxoplasmosis                                            |
| 40             | Transcriptional misregulation in cancer                  | 40                     | Axon guidance                                            | 40                 | Estrogen signaling pathway                               |
| 41             | Lysosome                                                 | 41                     | Neutrophil extracellular trap formation                  | 41                 | Insulin signaling pathway                                |
| 42             | Retrograde endocannabinoid signaling                     | 42                     | Rap1 signaling pathway                                   | 42                 | Tight junction                                           |
| 43             | Ras signaling pathway                                    | 43                     | Oxidative phosphorylation                                | 43                 | Protein processing in endoplasmic reticulum              |
| 44             | <b>AMPK signaling pathway</b>                            | 44                     | Apoptosis                                                | 44                 | Tuberculosis                                             |
| 45             | Hepatitis C                                              | 45                     | Necroptosis                                              | 45                 | NOD-like receptor signaling pathway                      |
| 46             | Wnt signaling pathway                                    | 46                     | Ras signaling pathway                                    | 46                 | Rap1 signaling pathway                                   |
| 47             | Influenza A                                              | 47                     | MicroRNAs in cancer                                      | 47                 | Thermogenesis                                            |
| 48             | Carbon metabolism                                        | 48                     | Measles                                                  | 48                 | Human immunodeficiency virus 1 infection                 |
| 49             | Fluid shear stress and atherosclerosis                   | 49                     | <b>FoxO signaling pathway</b>                            | 49                 | Coronavirus disease - COVID-19                           |
| 50             | Pathways of neurodegeneration - multiple diseases        | 50                     | Pathways of neurodegeneration - multiple diseases        | 50                 | Human T-cell leukemia virus 1 infection                  |

Note: Top 50 signaling pathways according to enrichment score. Compared with the control group, respectively. The red font represents oncogenic signaling pathways, while the blue font represents cancer suppressor related pathways (Figure 6).
